# Supplementary material for: Novel palladium and platinum carbene-complexes containing dithiocarbonate ligand [M(PPh3){η2(S,S)-S2CO]{C(SR)(NMe2)}] formed via alkyl migration of O-alkyldithiocarbonate to thiocarbamoyl ligand
Source: Royal Society of Chemistry journal article supplement (doi:10.1039/b305374a), 2003-01-01

ppm  
 7.57483  
 7.55778  
 7.53804  
 7.46198  
 7.44891  
 7.40711  
 7.39407  
 7.32648  
 7.31150  
 7.29592  
 7.18872  
 7.17515

3.52834  
 3.44993  
 3.24817  
 2.95993  
 2.87888

1.66524

Current Data Parameters  
 NAME ykh021203-147  
 EXPNO 100  
 PROCNO 1

F2 - Acquisition Paramet  
 Date\_ 500000  
 Time 14.56  
 INSTRUM spect  
 PROBHD 5 mm TBI w  
 PULPROG zg30  
 TD 32768  
 SOLVENT CDCl3  
 NS 32  
 DS 0  
 SWH 10000.000  
 FIDRES 0.305176  
 AQ 1.6384500  
 RG 256  
 DW 50.000  
 DE 10.00  
 TE 300.0  
 D1 1.00000000  
 P1 8.50  
 DE 10.00  
 SFO1 500.1335009  
 NUC1 1H  
 PL1 3.00

F2 - Processing paramete  
 SI 32768  
 SF 500.1300222  
 WDW no  
 SSB 0  
 LB 0.00  
 GB 0  
 PC 1.00

1D NMR plot parameters  
 CX 25.00  
 F1P 8.000  
 F1 4001.04  
 F2P 0.000  
 F2 0.00  
 PPMCM 0.32000  
 HZCM 160.04161

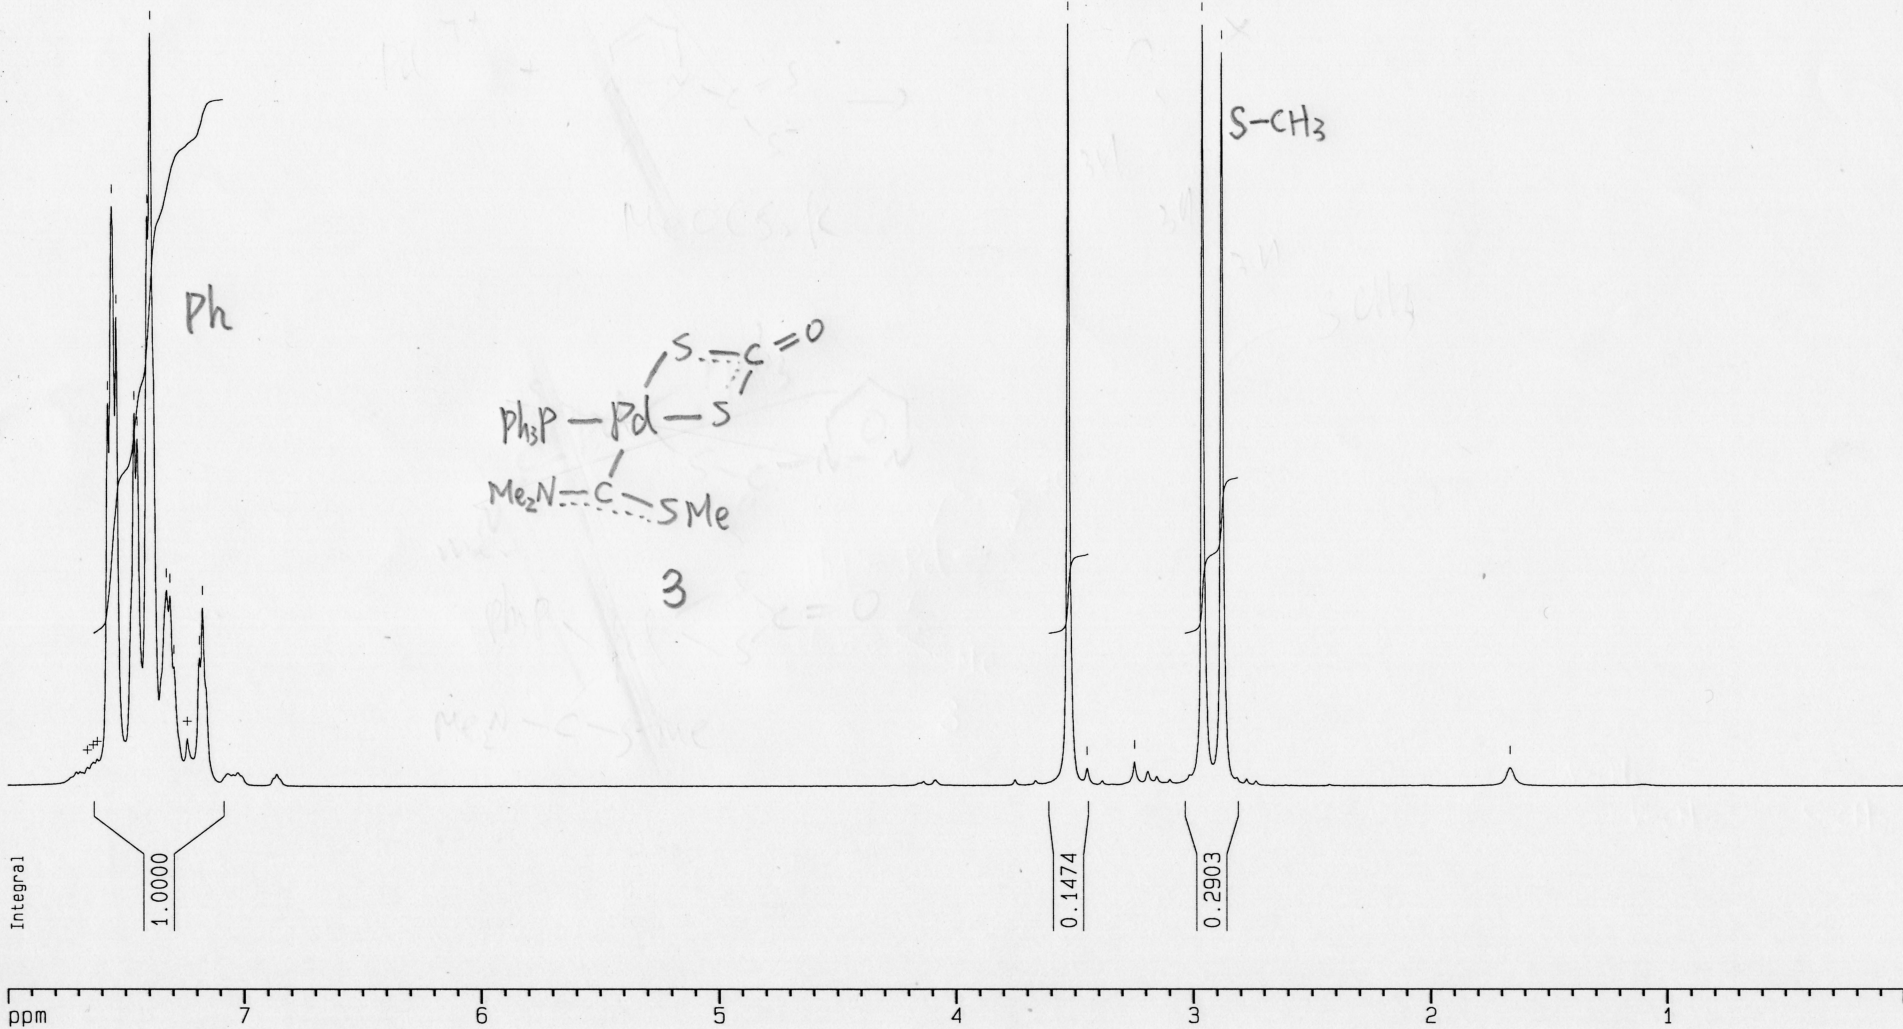

Supplement: esi_1h_nmr-cpd3.pdf [file esi_1h_nmr-cpd3.pdf]
