# Supplementary material for: Novel palladium and platinum carbene-complexes containing dithiocarbonate ligand [M(PPh3){η2(S,S)-S2CO]{C(SR)(NMe2)}] formed via alkyl migration of O-alkyldithiocarbonate to thiocarbamoyl ligand
Source: Royal Society of Chemistry journal article supplement (doi:10.1039/b305374a), 2003-01-01

ppm  
 7.62415  
 7.60810  
 7.56944  
 7.54698  
 7.47062  
 7.43391  
 7.42034  
 7.38896  
 7.37486  
 7.25651

4.56994  
 4.55648  
 4.54250  
 4.52888

3.85218  
 3.53684  
 3.30108  
 3.26566  
 2.95465  
 2.88655

1.41297  
 1.39903  
 1.38515  
 1.21804  
 1.20314  
 1.18816

Current Data Parameters  
 NAME ykh021008-124  
 EXPNO 100  
 PROCNO 1

F2 - Acquisition Paramete  
 Date\_ 500000  
 Time 18.01  
 INSTRUM spect  
 PROBHD 5 mm TBI W  
 PULPROG zg30  
 TD 32768  
 SOLVENT MeOH  
 NS 32  
 DS 0  
 SWH 10000.000  
 FIDRES 0.305176  
 AQ 1.6384500  
 RG 512  
 DW 50.000  
 DE 10.00  
 TE 300.0  
 D1 1.00000000  
 P1 8.50  
 DE 10.00  
 SF01 500.1335009  
 NUC1 1H  
 PL1 3.00

F2 - Processing paramete  
 SI 32768  
 SF 500.1300151  
 MDW no  
 SSB 0  
 LB 0.00  
 GB 0  
 PC 1.00

1D NMR plot parameters  
 CX 25.00  
 F1P 8.000  
 F1 4001.04  
 F2P 0.000  
 F2 0.00  
 PPMCM 0.32000  
 HZCM 160.04160

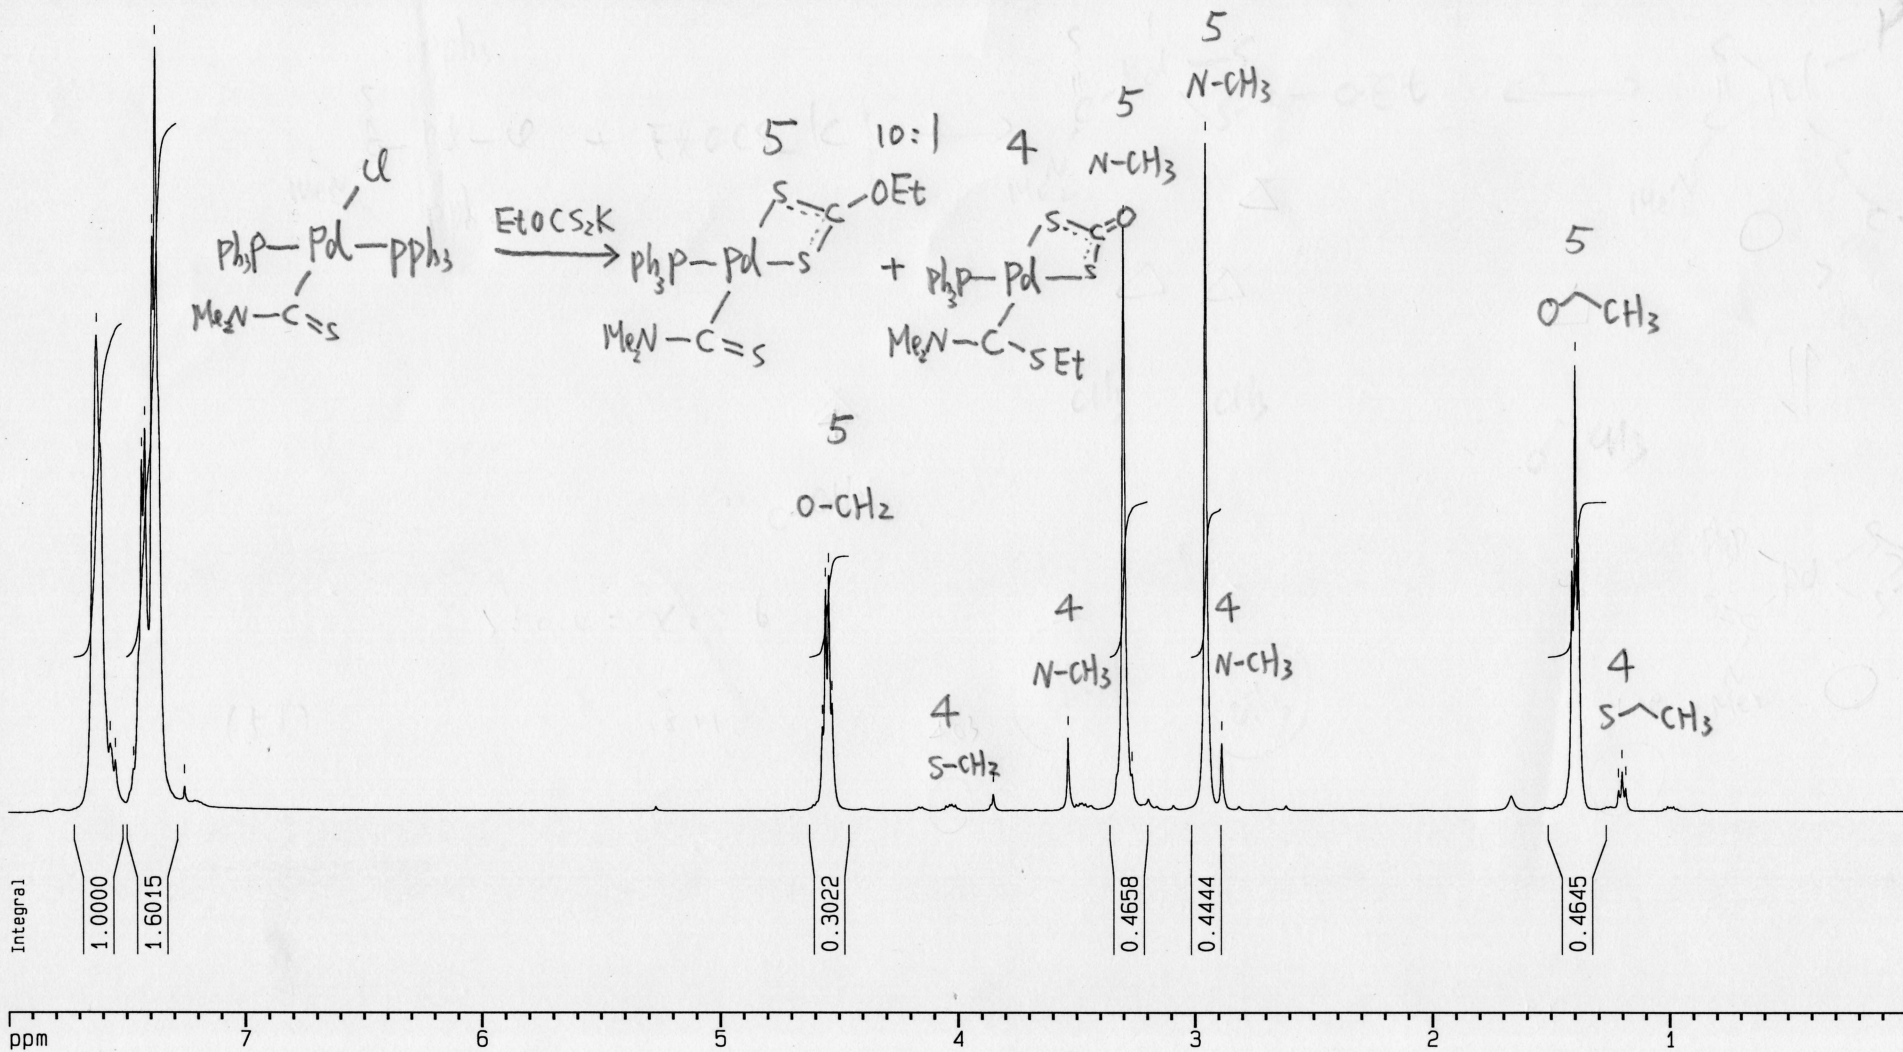

Supplement: esi_1h_nmr-cpd5_4.pdf [file esi_1h_nmr-cpd5_4.pdf]
