# Supplementary material for: Novel palladium and platinum carbene-complexes containing dithiocarbonate ligand [M(PPh3){η2(S,S)-S2CO]{C(SR)(NMe2)}] formed via alkyl migration of O-alkyldithiocarbonate to thiocarbamoyl ligand
Source: Royal Society of Chemistry journal article supplement (doi:10.1039/b305374a), 2003-01-01

Current Data Parameters  
 NAME yeh147  
 EXPNO 10  
 PROCNO 1

F2 - Acquisition Parameters  
 Date\_ 20080805  
 Time 11:06  
 INSTRUM spect  
 PROBHD 5 mm BBO C1  
 PULPROG zgpg30  
 ID 62536  
 SOLVENT CDCl3  
 NS 3216  
 DS 4  
 SWH 3793.884 Hz  
 FIDRES 0.37829 Hz  
 AQ 0.8716788 sec  
 RG 16384  
 SW 13.300 usec  
 DE 30.00 usec  
 TE 300.0 K  
 D15 0.00000000 sec  
 PL13 20.00 dB  
 D1 2.50000000 sec  
 CPDPRG2 waltz16  
 PCPD2 90.00 usec  
 SF02 500.1300000 MHz  
 NU2 1H  
 PL2 1.00 dB  
 PL12 20.00 dB  
 P1 9.00 usec  
 DE 30.00 usec  
 SF01 125.753451 MHz  
 NU1 13C  
 PL1 0.00 dB  
 D11 0.03000000 sec

F2 - Processing parameters  
 SI 32768  
 SF 125.7578017 MHz  
 MDW EM  
 SSB 0  
 LB 1.00 Hz  
 GB 0  
 PC 1.00

1D NMR plot parameters  
 CX 25.00 cm  
 FID 260.000 ppm  
 F1 32857.03 Hz  
 F2 0.000 ppm  
 F3 0.00 Hz  
 PPMCM 10.40000 ppm/cm  
 HZCM 1307.88123 Hz/cm

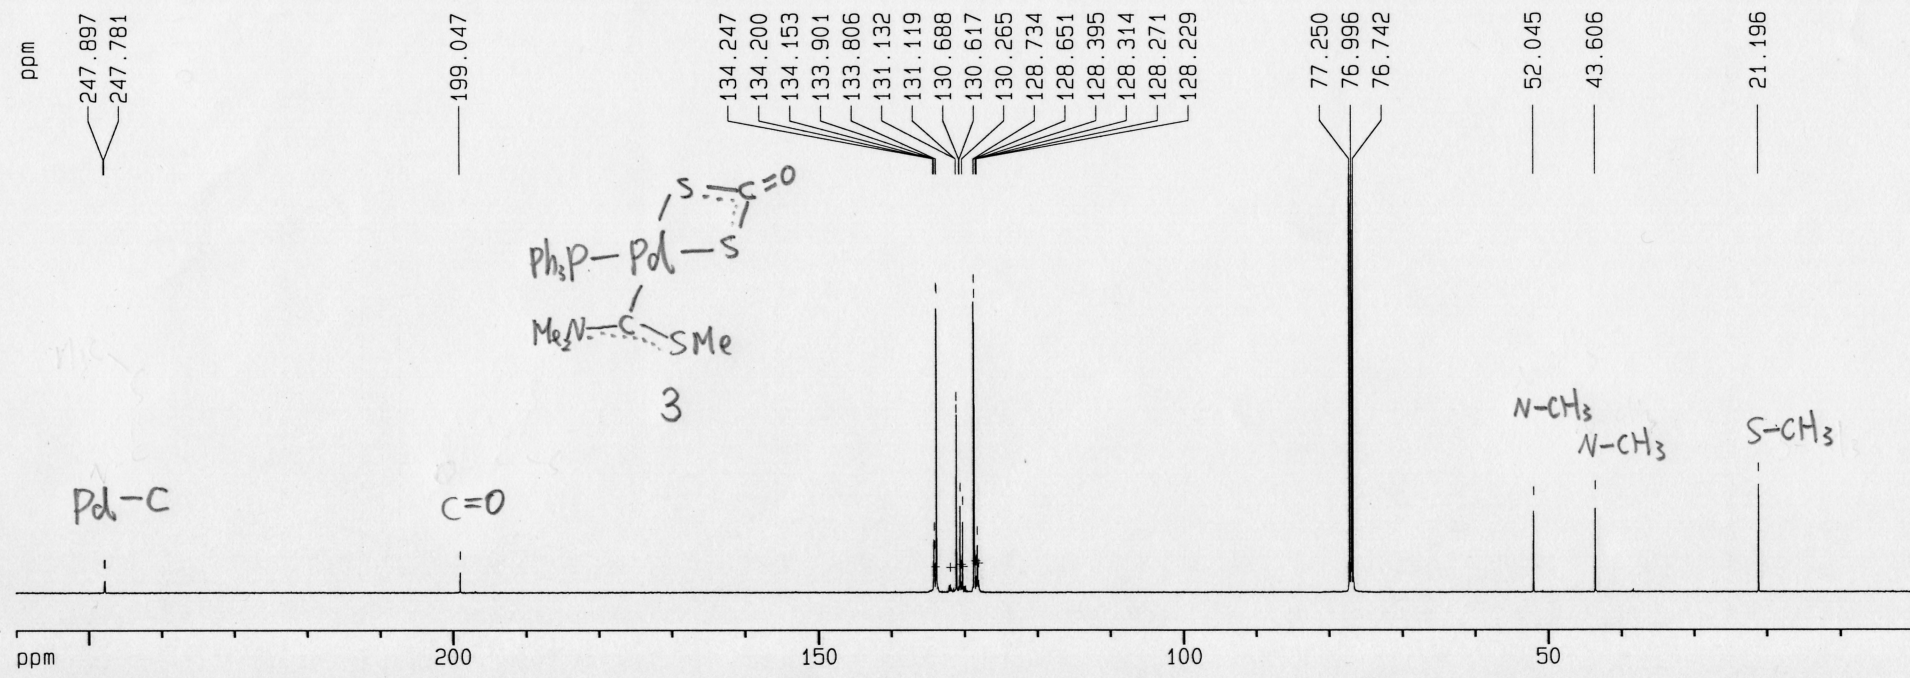

Supplement: esi_13c_nmr-cpd3.pdf [file esi_13c_nmr-cpd3.pdf]
